# Supplementary material
Source: PubMed Central journal article supplement (PMC4249390)
Supplement: AAC.03323-14_zac011143386so1.pdf [file AAC.03323-14_zac011143386so1.pdf]

**Table S1. Prevalence of mutant genotypes among *P. falciparum* and *P. vivax* monoclonal infections**

|                                                                                 | Prevalence (%) |
|---------------------------------------------------------------------------------|----------------|
| <i>P. falciparum</i>                                                            | n=137          |
| <b><i>pfdhfr</i> codons 51-59-108-164</b>                                       |                |
| 59 <u><b>R</b></u> -108 <u><b>N</b></u>                                         | 98.5           |
| <b><i>pfdhps</i> codons 436-437-540-581-613</b>                                 |                |
| 437 <u><b>G</b></u>                                                             | 18.2           |
| 437 <u><b>G</b></u> -540 <u><b>E</b></u>                                        | 11.7           |
| <b>Combined <i>pfdhfr</i> / <i>pfdhps</i> haplotype</b>                         |                |
| triple mutant                                                                   | 17.5           |
| quadruple mutant                                                                | 11.7           |
| <b><i>pfert</i> codons 72-73-74-75-76</b>                                       |                |
| 72 <u><b>S</b></u> -76 <u><b>T</b></u>                                          | 98.5           |
| <b><i>pfmdr1</i> codons 86-184-1034-1042-1246</b>                               |                |
| 86 <u><b>Y</b></u>                                                              | 92.7           |
| 184 <u><b>F</b></u>                                                             | 1.5            |
| 184 <u><b>F</b></u> -1042 <u><b>D</b></u>                                       | 1.5            |
| <i>P. vivax</i>                                                                 | n=246          |
| <b><i>pvdhfr</i> codons 57-58-61-117</b>                                        |                |
| 57 <u><b>N</b></u>                                                              | 1.2            |
| 58 <u><b>R</b></u> - 117 <u><b>N</b></u>                                        | 6.1            |
| 57 <u><b>L</b></u> -58 <u><b>R</b></u>                                          | 23.2           |
| 57 <u><b>L</b></u> -58 <u><b>R</b></u> -117 <u><b>T</b></u>                     | 3.2            |
| 57 <u><b>L</b></u> -58 <u><b>R</b></u> -61 <u><b>M</b></u> -117 <u><b>T</b></u> | 57.3           |
| 57 <u><b>I</b></u> -58 <u><b>R</b></u> -61 <u><b>M</b></u> -117 <u><b>T</b></u> | 0.4            |
| <b><i>pvdhps</i> codons 382-383-553-647</b>                                     |                |
| 647 <u><b>P</b></u>                                                             | 94.7           |
| 383 <u><b>G</b></u> -647 <u><b>P</b></u>                                        | 1.6            |
| 383 <u><b>G</b></u> -553 <u><b>G</b></u> -647 <u><b>P</b></u>                   | 0.4            |
| <b><i>pymdr1</i> codon 976</b>                                                  |                |
| 976 <u><b>F</b></u>                                                             | 68.3           |

Bold and underlined font represents mutant amino acids.
